# Supplementary material
Source: PubMed Central journal article supplement (PMC10841247)
Supplement: NIHMS1924951-supplement-Supplemental_Digital_Content.pdf [file NIHMS1924951-supplement-Supplemental_Digital_Content.pdf]

**SUPPLEMENTAL DIGITAL CONTENT****Association of labor neuraxial analgesia with maternal blood transfusion.**

Jean GUGLIELMINOTTI, Ruth LANDAU, Jamie DAW, Alexander M. FRIEDMAN, Guohua LI.

|                             |                                                                                         |
|-----------------------------|-----------------------------------------------------------------------------------------|
| <b>Supplemental Table 1</b> | Conditions and procedures used to identify intrapartum cesarean deliveries              |
| <b>Supplemental Table 2</b> | Variables included in the propensity score                                              |
| <b>Supplemental Table 3</b> | Comparison of the hospital state of delivery before and after propensity-score matching |
| <b>Supplemental Table 4</b> | Univariate comparison before and after inverse propensity-score weighting               |
| <b>Supplemental Table 5</b> | Subgroups analyses                                                                      |

This supplementary material has been provided by the authors to give readers additional information about their work.

**Supplemental Table 1:** Conditions and procedures used to identify intrapartum cesarean deliveries (n = 2,532,011). Conditions and procedures are not mutually exclusive.

|                                                                                | <b>Count (%)</b>  |
|--------------------------------------------------------------------------------|-------------------|
| Antibiotics received by the mother during labor                                | 1,649,669 (65.1%) |
| Trial of labor attempted if previous cesarean delivery (missing = 1,025)       | 1,225,924 (48.7%) |
| Induction of labor (missing = 477)                                             | 747,949 (29.5%)   |
| Augmentation of labor                                                          | 469,013 (18.5%)   |
| Clinical chorioamnionitis diagnosed during labor or maternal temperature >38°C | 87,774 (3.5%)     |

**Supplemental Table 2:** Variables included in the propensity score to estimate the individual probability of receiving labor neuraxial analgesia. The delivery mode (vaginal or intrapartum cesarean delivery) was not included in the propensity score. The propensity score was estimated for each year of the study period using a fixed-effect logistic regression with the hospital state identifier as a fixed effect. A complete case analysis was performed with 968,635 discharges excluded or 7.7%.

|    |                                                   | <b>Number of missing values</b> |
|----|---------------------------------------------------|---------------------------------|
|    | <i>General characteristics</i>                    |                                 |
| 1  | Age                                               | 0                               |
| 2  | Race or ethnicity                                 | 0                               |
| 3  | Education level                                   | 101,439                         |
| 4  | Health insurance                                  | 71,467                          |
| 5  | Body mass index                                   | 315,036                         |
|    | <i>Residence county characteristics</i>           |                                 |
| 6  | Core base statistical area classification         | 1888                            |
| 7  | Percent persons in poverty                        | 1888                            |
| 8  | Percent unemployed                                | 1888                            |
|    | <i>Comorbidities</i>                              |                                 |
| 9  | Preexisting diabetes                              | 0                               |
| 10 | Gestational diabetes                              | 0                               |
| 11 | Preexisting hypertension                          | 0                               |
| 12 | Gestational hypertension                          | 0                               |
|    | <i>Pregnancy, labor, and delivery</i>             |                                 |
| 13 | Previous cesarean section                         | 0                               |
| 14 | Month prenatal care began                         | 341,841                         |
| 15 | Number of prenatal visits                         | 330,752                         |
| 16 | Delivery during a weekend                         | 0                               |
| 17 | Mother transferred in                             | 3739                            |
| 18 | Nulliparous                                       | 52,875                          |
| 19 | Gestational age at delivery                       | 5688                            |
| 20 | Multiple gestation                                | 0                               |
| 21 | Non-cephalic presentation                         | 67,874                          |
| 22 | Induction of labor                                | 2138                            |
| 23 | Augmentation of labor                             | 0                               |
| 24 | Antibiotics during labor                          | 0                               |
| 25 | Chorioamnionitis                                  | 0                               |
| 26 | Attendant at birth                                | 4179                            |
| 27 | Birth weight                                      | 8648                            |
|    | <i>Hospital county characteristics</i>            |                                 |
| 28 | Core base statistical area classification         | 897                             |
| 29 | Number of in-hospital births                      | 897                             |
| 30 | Number of physician anesthesiologists             | 68,099                          |
| 31 | Number of certified registered nurse anesthetists | 68,099                          |
| 32 | Number of obstetricians and gynecologists         | 68,099                          |
|    | <i>Other</i>                                      |                                 |
| 33 | Hospital state identifier                         | 0                               |

**Supplemental Table 3:** Comparison of the hospital state of delivery between women who received and women who did not receive labor neuraxial analgesia, before and after propensity-score matching (United States, 2015-2018).

|    | Before matching<br>(Absolute standardized difference = 34.0%) |                                              |                                          | After matching<br>(Absolute standardized difference = 103.2%) |                                               |                                            |
|----|---------------------------------------------------------------|----------------------------------------------|------------------------------------------|---------------------------------------------------------------|-----------------------------------------------|--------------------------------------------|
|    | All women<br>n = 12,503,042                                   | No labor neuraxial analgesia<br>n= 3,023,751 | Labor neuraxial analgesia<br>n=9,479,291 | All women<br>n = 5,178,986                                    | No labor neuraxial Analgesia<br>n = 2,589,493 | Labor neuraxial Analgesia<br>n = 2,589,493 |
| AK | 33,507 (0.3%)                                                 | 16,201 (0.5%)                                | 17,306 (0.2%)                            | 26,085 (0.5%)                                                 | 10,225 (0.4%)                                 | 15,860 (0.6%)                              |
| AL | 180,219 (1.4%)                                                | 25,143 (0.8%)                                | 155,076 (1.6%)                           | 170,664 (3.3%)                                                | 23,424 (0.9%)                                 | 147,240 (5.7%)                             |
| AR | 113,947 (0.9%)                                                | 29,811 (1.0%)                                | 84,136 (0.9%)                            | 92,520 (1.8%)                                                 | 20,442 (0.8%)                                 | 72,078 (2.8%)                              |
| AZ | 291,815 (2.3%)                                                | 62,148 (2.1%)                                | 229,667 (2.4%)                           | 263,618 (5.1%)                                                | 57,338 (2.2%)                                 | 206,280 (8.0%)                             |
| CA | 1,517,621 (12.1%)                                             | 504,694 (16.7%)                              | 1,012,927 (10.7%)                        | 1,229,763 (23.7%)                                             | 415,870 (16.1%)                               | 813,893 (31.4%)                            |
| CO | 221,297 (1.8%)                                                | 56,682 (1.9%)                                | 164,615 (1.7%)                           | 160,593 (3.1%)                                                | 49,898 (1.9%)                                 | 110,695 (4.3%)                             |
| CT | 84,102 (0.7%)                                                 | 22,920 (0.8%)                                | 61,182 (0.6%)                            | 60,511 (1.2%)                                                 | 20,903 (0.8%)                                 | 39,608 (1.5%)                              |
| DC | 28,368 (0.2%)                                                 | 10,501 (0.3%)                                | 17,867 (0.2%)                            | 20,979 (0.4%)                                                 | 8390 (0.3%)                                   | 12,589 (0.5%)                              |
| DE | 36,301 (0.3%)                                                 | 14,007 (0.5%)                                | 22,294 (0.2%)                            | 29,400 (0.6%)                                                 | 11,533 (0.4%)                                 | 17,867 (0.7%)                              |
| FL | 690,107 (5.5%)                                                | 173,413 (5.7%)                               | 516,694 (5.5%)                           | 413,330 (8.0%)                                                | 142,715 (5.5%)                                | 270,615 (10.5%)                            |
| GA | 410,520 (3.3%)                                                | 90,116 (3.0%)                                | 320,404 (3.4%)                           | 197,054 (3.8%)                                                | 77,238 (3.0%)                                 | 119,816 (4.6%)                             |
| HI | 60,895 (0.5%)                                                 | 16,822 (0.6%)                                | 44,073 (0.5%)                            | 31,771 (0.6%)                                                 | 13,542 (0.5%)                                 | 18,229 (0.7%)                              |
| IA | 118,138 (0.9%)                                                | 40,068 (1.3%)                                | 78,070 (0.8%)                            | 84,023 (1.6%)                                                 | 35,031 (1.4%)                                 | 48,992 (1.9%)                              |
| ID | 72,968 (0.6%)                                                 | 17,342 (0.6%)                                | 55,626 (0.6%)                            | 37,233 (0.7%)                                                 | 16,189 (0.6%)                                 | 21,044 (0.8%)                              |
| IL | 478,545 (3.8%)                                                | 122,027 (4.0%)                               | 356,518 (3.8%)                           | 217,895 (4.2%)                                                | 103,849 (4.0%)                                | 114,046 (4.4%)                             |
| IN | 273,742 (2.2%)                                                | 62,096 (2.1%)                                | 211,646 (2.2%)                           | 107,110 (2.1%)                                                | 57,926 (2.2%)                                 | 49,184 (1.9%)                              |
| KS | 121,453 (1.0%)                                                | 23,840 (0.8%)                                | 97,613 (1.0%)                            | 40,136 (0.8%)                                                 | 22,857 (0.9%)                                 | 17,279 (0.7%)                              |
| KY | 170,256 (1.4%)                                                | 31,913 (1.1%)                                | 138,343 (1.5%)                           | 47,031 (0.9%)                                                 | 28,281 (1.1%)                                 | 18,750 (0.7%)                              |
| LA | 196,072 (1.6%)                                                | 29,529 (1.0%)                                | 166,543 (1.8%)                           | 36,976 (0.7%)                                                 | 26,263 (1.0%)                                 | 10,713 (0.4%)                              |
| MA | 227,397 (1.8%)                                                | 56,721 (1.9%)                                | 170,676 (1.8%)                           | 93,641 (1.8%)                                                 | 50,088 (1.9%)                                 | 43,553 (1.7%)                              |
| MD | 212,579 (1.7%)                                                | 51,048 (1.7%)                                | 161,531 (1.7%)                           | 72,179 (1.4%)                                                 | 42,419 (1.6%)                                 | 29,760 (1.1%)                              |
| ME | 39,934 (0.3%)                                                 | 18,393 (0.6%)                                | 215,41 (0.2%)                            | 25,855 (0.5%)                                                 | 13,692 (0.5%)                                 | 12,163 (0.5%)                              |
| MI | 372,268 (3.0%)                                                | 105,101 (3.5%)                               | 267,167 (2.8%)                           | 155,883 (3.0%)                                                | 91,885 (3.5%)                                 | 63,998 (2.5%)                              |
| MN | 219,627 (1.8%)                                                | 72,741 (2.4%)                                | 146,886 (1.5%)                           | 110,583 (2.1%)                                                | 62,518 (2.4%)                                 | 48,065 (1.9%)                              |
| MO | 244,433 (2.0%)                                                | 45,029 (1.5%)                                | 199,404 (2.1%)                           | 47,301 (0.9%)                                                 | 36,714 (1.4%)                                 | 10,587 (0.4%)                              |

**Supplemental Table 3 (continued)**

|    | Before matching<br>(Absolute standardized difference = 34.0%) |                                              |                                          | After matching<br>(Absolute standardized difference = 103.2%) |                                               |                                            |
|----|---------------------------------------------------------------|----------------------------------------------|------------------------------------------|---------------------------------------------------------------|-----------------------------------------------|--------------------------------------------|
|    | All women<br>n = 12,503,042                                   | No labor neuraxial analgesia<br>n= 3,023,751 | Labor neuraxial analgesia<br>n=9,479,291 | All women<br>n = 5,178,986                                    | No labor neuraxial Analgesia<br>n = 2,589,493 | Labor neuraxial Analgesia<br>n = 2,589,493 |
| MS | 104,197 (0.8%)                                                | 37,519 (1.2%)                                | 66,678 (0.7%)                            | 56,849 (1.1%)                                                 | 31,847 (1.2%)                                 | 25,002 (1.0%)                              |
| MT | 39,162 (0.3%)                                                 | 9796 (0.3%)                                  | 29,366 (0.3%)                            | 13,704 (0.3%)                                                 | 9105 (0.4%)                                   | 4599 (0.2%)                                |
| NC | 404,610 (3.2%)                                                | 104,969 (3.5%)                               | 299,641 (3.2%)                           | 140,554 (2.7%)                                                | 93,645 (3.6%)                                 | 46,909 (1.8%)                              |
| ND | 35,748 (0.3%)                                                 | 9049 (0.3%)                                  | 26,699 (0.3%)                            | 10,968 (0.2%)                                                 | 7702 (0.3%)                                   | 3266 (0.1%)                                |
| NE | 86,893 (0.7%)                                                 | 18,705 (0.6%)                                | 68,188 (0.7%)                            | 22,126 (0.4%)                                                 | 16,892 (0.7%)                                 | 5234 (0.2%)                                |
| NH | 36,158 (0.3%)                                                 | 13,092 (0.4%)                                | 23,066 (0.2%)                            | 16,871 (0.3%)                                                 | 10,548 (0.4%)                                 | 6323 (0.2%)                                |
| NJ | 290,274 (2.3%)                                                | 70,141 (2.3%)                                | 220,133 (2.3%)                           | 84,671 (1.6%)                                                 | 63,819 (2.5%)                                 | 20,852 (0.8%)                              |
| NM | 78,041 (0.6%)                                                 | 30,177 (1.0%)                                | 47,864 (0.5%)                            | 35,860 (0.7%)                                                 | 21,818 (0.8%)                                 | 14,042 (0.5%)                              |
| NV | 111,224 (0.9%)                                                | 23,854 (0.8%)                                | 87,370 (0.9%)                            | 25,912 (0.5%)                                                 | 21,225 (0.8%)                                 | 4687 (0.2%)                                |
| NY | 771,040 (6.2%)                                                | 119,760 (4.0%)                               | 651,280 (6.9%)                           | 121,149 (2.3%)                                                | 108,844 (4.2%)                                | 12,305 (0.5%)                              |
| OH | 487,498 (3.9%)                                                | 92,663 (3.1%)                                | 394,835 (4.2%)                           | 97,249 (1.9%)                                                 | 85,266 (3.3%)                                 | 11,983 (0.5%)                              |
| OK | 169,668 (1.4%)                                                | 30,460 (1.0%)                                | 139,208 (1.5%)                           | 31,446 (0.6%)                                                 | 27,903 (1.1%)                                 | 3543 (0.1%)                                |
| OR | 139,864 (1.1%)                                                | 44,646 (1.5%)                                | 95,218 (1.0%)                            | 56,977 (1.1%)                                                 | 39,122 (1.5%)                                 | 17,855 (0.7%)                              |
| PA | 444,640 (3.6%)                                                | 110,119 (3.6%)                               | 33,4521 (3.5%)                           | 103,821 (2.0%)                                                | 87,299 (3.4%)                                 | 16,522 (0.6%)                              |
| RI | 33,523 (0.3%)                                                 | 7235 (0.2%)                                  | 26,288 (0.3%)                            | 5180 (0.1%)                                                   | 4208 (0.2%)                                   | 972 (<0.1%)                                |
| SC | 177,837 (1.4%)                                                | 27,088 (0.9%)                                | 150,749 (1.6%)                           | 26,751 (0.5%)                                                 | 25,107 (1.0%)                                 | 1644 (0.1%)                                |
| SD | 41,393 (0.3%)                                                 | 15,675 (0.5%)                                | 25,718 (0.3%)                            | 18,794 (0.4%)                                                 | 12,475 (0.5%)                                 | 6319 (0.2%)                                |
| TN | 276,370 (2.2%)                                                | 49,327 (1.6%)                                | 227,043 (2.4%)                           | 39,803 (0.8%)                                                 | 36,938 (1.4%)                                 | 2865 (0.1%)                                |
| TX | 126,2516 (10.1%)                                              | 253,126 (8.4%)                               | 1,009,390 (10.6%)                        | 264,295 (5.1%)                                                | 240,641 (9.3%)                                | 23,654 (0.9%)                              |
| UT | 171,465 (1.4%)                                                | 22,749 (0.8%)                                | 148,716 (1.6%)                           | 20,889 (0.4%)                                                 | 20,615 (0.8%)                                 | 274 (<0.1%)                                |
| VA | 315,208 (2.5%)                                                | 69,943 (2.3%)                                | 245,265 (2.6%)                           | 52,614 (1.0%)                                                 | 48,543 (1.9%)                                 | 4071 (0.2%)                                |
| VT | 17,018 (0.1%)                                                 | 6852 (0.2%)                                  | 10,166 (0.1%)                            | 7288 (0.1%)                                                   | 5137 (0.2%)                                   | 2151 (0.1%)                                |
| WA | 288,306 (2.3%)                                                | 78,638 (2.6%)                                | 209,668 (2.2%)                           | 74,960 (1.4%)                                                 | 63,591 (2.5%)                                 | 11,369 (0.4%)                              |
| WI | 228,948 (1.8%)                                                | 64,798 (2.1%)                                | 164,150 (1.7%)                           | 63,034 (1.2%)                                                 | 54,199 (2.1%)                                 | 8835 (0.3%)                                |
| WV | 54,434 (0.4%)                                                 | 9506 (0.3%)                                  | 44,928 (0.5%)                            | 9057 (0.2%)                                                   | 8562 (0.3%)                                   | 495 (<0.1%)                                |
| WY | 20,896 (0.2%)                                                 | 5558 (0.2%)                                  | 15,338 (0.2%)                            | 6030 (0.1%)                                                   | 5212 (0.2%)                                   | 818 (<0.1%)                                |

**Supplemental Table 4:** Univariate comparison before and after inverse propensity-score weighting (United States, 2015-2018). Weights are stabilized and truncated at 1% and 99%.

|                                                     | Before weighting |                                               |                                      | After weighting                  |                                               |                                      |                                  |
|-----------------------------------------------------|------------------|-----------------------------------------------|--------------------------------------|----------------------------------|-----------------------------------------------|--------------------------------------|----------------------------------|
|                                                     | Missing          | No labor neuraxial analgesia<br>n = 3,023,751 | Neuraxial analgesia<br>n = 9,479,291 | Absolute standardized difference | No labor neuraxial analgesia<br>n = 2,626,611 | Neuraxial analgesia<br>n = 8,796,641 | Absolute standardized difference |
| <i>General characteristics</i>                      |                  |                                               |                                      |                                  |                                               |                                      |                                  |
| Age (year)                                          | 0                |                                               |                                      | 3.4%                             |                                               |                                      | 1.1%                             |
| ≤ 19                                                |                  | 165,113 (5.5%)                                | 579,733 (6.1%)                       |                                  | 159,137 (6.1%)                                | 521,137 (5.9%)                       |                                  |
| 20-29                                               |                  | 1,525,142 (50.4%)                             | 4,834,847 (51.0%)                    |                                  | 1,347,466 (51.3%)                             | 4,479,409 (50.9%)                    |                                  |
| 30-39                                               |                  | 1,246,573 (41.2%)                             | 3,808,509 (40.2%)                    |                                  | 1,048,598 (39.9%)                             | 3,556,835 (40.4%)                    |                                  |
| ≥ 40                                                |                  | 86,923 (2.9%)                                 | 256,202 (2.7%)                       |                                  | 71,409 (2.7%)                                 | 239,260 (2.7%)                       |                                  |
| Race or ethnicity                                   | 0                |                                               |                                      | <b>20.6%</b>                     |                                               |                                      | 1.6%                             |
| White                                               |                  | 1,378,413 (45.6%)                             | 5,128,373 (54.1%)                    |                                  | 1,368,268 (52.1%)                             | 4,622,995 (52.6%)                    |                                  |
| Black                                               |                  | 447,217 (14.8%)                               | 1,354,148 (14.3%)                    |                                  | 373,199 (14.2%)                               | 123,5291 (14.0%)                     |                                  |
| Hispanic                                            |                  | 897,500 (29.7%)                               | 2,074,383 (21.9%)                    |                                  | 633,732 (24.1%)                               | 2,082,304 (23.7%)                    |                                  |
| Asian and Pacific Islander                          |                  | 200,404 (6.6%)                                | 650,659 (6.9%)                       |                                  | 172,000 (6.5%)                                | 596,422 (6.8%)                       |                                  |
| Native American                                     |                  | 37,384 (1.2%)                                 | 62,602 (0.7%)                        |                                  | 21,543 (0.8%)                                 | 67,504 (0.8%)                        |                                  |
| More than one race                                  |                  | 62,833 (2.1%)                                 | 209,126 (2.2%)                       |                                  | 57,867 (2.2%)                                 | 192,125 (2.2%)                       |                                  |
| Education level                                     | 101,439          |                                               |                                      | <b>23.8%</b>                     |                                               |                                      | 2.2%                             |
| Less than high school                               |                  | 177,715 (5.9%)                                | 216,920 (2.3%)                       |                                  | 85,248 (3.2%)                                 | 265,753 (3.0%)                       |                                  |
| High-school with no diploma                         |                  | 383,634 (12.8%)                               | 916,568 (9.7%)                       |                                  | 279,686 (10.6%)                               | 909,999 (10.3%)                      |                                  |
| High school graduate or general educational diploma |                  | 817,835 (27.3%)                               | 2,374,954 (25.2%)                    |                                  | 684,826 (26.1%)                               | 2,252,811 (25.6%)                    |                                  |
| College and higher                                  |                  | 1,611,188 (53.9%)                             | 5,902,789 (62.7%)                    |                                  | 1,576,850 (60.0%)                             | 5,368,078 (61.0%)                    |                                  |
| Health insurance                                    | 71,467           |                                               |                                      | <b>20.8%</b>                     |                                               |                                      | 2.3%                             |
| Medicaid                                            |                  | 1,462,514 (48.7%)                             | 3,946,677 (41.9%)                    |                                  | 1,157,816 (44.1%)                             | 3,797,272 (43.2%)                    |                                  |
| Private                                             |                  | 1,263,737 (42.1%)                             | 4,854,450 (51.5%)                    |                                  | 1,275,208 (48.5%)                             | 4,372,659 (49.7%)                    |                                  |
| Self-pay (uninsured)                                |                  | 154,252 (5.1%)                                | 267,327 (2.8%)                       |                                  | 89,076 (3.4%)                                 | 286,316 (3.3%)                       |                                  |
| Other                                               |                  | 121,681 (4.1%)                                | 360,937 (3.8%)                       |                                  | 104,510 (4.0%)                                | 340,394 (3.9%)                       |                                  |
| Body mass index (kg/m <sup>2</sup> )                | 315,036          |                                               |                                      | 7.8%                             |                                               |                                      | <0.1%                            |
| ≤ 18.4                                              |                  | 112,902 (3.9%)                                | 325,944 (3.5%)                       |                                  | 96,041 (3.7%)                                 | 314,653 (3.6%)                       |                                  |
| 18.5-24.9                                           |                  | 1,361,675 (46.5%)                             | 4,109,496 (44.4%)                    |                                  | 1,179,881 (44.9%)                             | 3,944,283 (44.8%)                    |                                  |
| 25.0-29.9                                           |                  | 773,205 (26.4%)                               | 2,416,486 (26.1%)                    |                                  | 684,884 (26.1%)                               | 2,301,473 (26.2%)                    |                                  |
| 30.0-34.9                                           |                  | 396,969 (13.6%)                               | 1,323,496 (14.3%)                    |                                  | 370,508 (14.1%)                               | 1,243,831 (14.1%)                    |                                  |
| ≥ 35                                                |                  | 280,976 (9.6%)                                | 1,086,857 (11.7%)                    |                                  | 295,296 (11.2%)                               | 992,401 (11.3%)                      |                                  |
| <i>County of residence</i>                          |                  |                                               |                                      |                                  |                                               |                                      |                                  |
| Core base statistical area classification (a)       | 1888             |                                               |                                      | 9.2%                             |                                               |                                      | 2.2%                             |
| Metropolitan                                        |                  | 2,556,456 (84.6%)                             | 8,315,894 (87.7%)                    |                                  | 2,257,009 (85.9%)                             | 7,624,253 (86.7%)                    |                                  |
| Micropolitan                                        |                  | 287,815 (9.5%)                                | 731,251 (7.7%)                       |                                  | 231,858 (8.8%)                                | 738,511 (8.4%)                       |                                  |
| Non-metropolitan and non-micropolitan               |                  | 178,173 (5.9%)                                | 431,565 (4.6%)                       |                                  | 137,744 (5.2%)                                | 433,877 (4.9%)                       |                                  |
| Percent persons in poverty (a)                      | 1888             | 14.6 (1 sd, 5.2)                              | 14.3 (1 sd, 5.1)                     | 5.8%                             | 14.4 (1 sd, 5.1)                              | 14.3 (1 sd, 5.2)                     | 1.4%                             |
| Percent unemployed (a)                              | 1888             | 5.1 (1 sd, 1.7)                               | 4.8 (1 sd, 1.4)                      | <b>14.0%</b>                     | 4.9 (1 sd, 1.5)                               | 4.9 (1 sd, 1.5)                      | 2.8%                             |
| <i>Comorbidities</i>                                |                  |                                               |                                      |                                  |                                               |                                      |                                  |
| Preexisting diabetes                                | 0                | 17,297 (0.6%)                                 | 78,234 (0.8%)                        | 3.0%                             | 19,838 (0.8%)                                 | 67,067 (0.8%)                        | <0.1%                            |
| Gestational diabetes                                | 0                | 155,631 (5.1%)                                | 589,522 (6.2%)                       | 4.6%                             | 157,272 (6.0%)                                | 530,150 (6.0%)                       | <0.1%                            |
| Preexisting hypertension                            | 0                | 35620 (1.2%)                                  | 175,708 (1.9%)                       | 5.5%                             | 43,745 (1.7%)                                 | 148,675 (1.7%)                       | <0.1%                            |
| Gestational hypertension                            | 0                | 118727 (3.9%)                                 | 661,735 (7.0%)                       | <b>13.5%</b>                     | 162,254 (6.2%)                                | 556,514 (6.3%)                       | <0.1%                            |

Supplemental Table 4 (continued)

|                                       | Before weighting |                                               |                                      |                                  | After weighting                               |                                      |                                  |
|---------------------------------------|------------------|-----------------------------------------------|--------------------------------------|----------------------------------|-----------------------------------------------|--------------------------------------|----------------------------------|
|                                       | Missing          | No labor neuraxial analgesia<br>n = 3,023,751 | Neuraxial analgesia<br>n = 9,479,291 | Absolute standardized difference | No labor neuraxial analgesia<br>n = 2,626,611 | Neuraxial analgesia<br>n = 8,796,641 | Absolute standardized difference |
| <i>Pregnancy, labor, and delivery</i> |                  |                                               |                                      |                                  |                                               |                                      |                                  |
| Previous cesarean section             | 0                | 139,116 (4.6%)                                | 909,325 (9.6%)                       | <b>19.5%</b>                     | 199,215 (7.6%)                                | 735,414 (8.4%)                       | 2.9%                             |
| Month prenatal care began             | 341,841          |                                               |                                      | <b>13.7%</b>                     |                                               |                                      | 1.3%                             |
| 1 <sup>st</sup> -3 <sup>rd</sup>      |                  | 2,150,999 (73.6%)                             | 7,259,086 (78.6%)                    |                                  | 2,027,256 (77.2%)                             | 6,838,307 (77.7%)                    |                                  |
| 4 <sup>th</sup> -6 <sup>th</sup>      |                  | 543,708 (18.6%)                               | 1,470,546 (15.9%)                    |                                  | 443,806 (16.9%)                               | 1,452,171 (16.5%)                    |                                  |
| ≥ 7 <sup>th</sup>                     |                  | 148,467 (5.1%)                                | 394,142 (4.3%)                       |                                  | 117,506 (4.5%)                                | 383,063 (4.4%)                       |                                  |
| No prenatal care                      |                  | 77,462 (2.7%)                                 | 116,791 (1.3%)                       |                                  | 38,042 (1.4%)                                 | 123,100 (1.4%)                       |                                  |
| Number of prenatal visits             | 330,752          | 10.8 (1 sd, 4.2)                              | 11.5 (1 sd, 4.0)                     | <b>16.5%</b>                     | 11.3 (1 sd, 4.1)                              | 11.4 (1 sd, 4.0)                     | 1.5%                             |
| Delivery during a weekend             | 0                | 842,057 (27.8%)                               | 2,570,093 (27.1%)                    | 1.6%                             | 716,830 (27.3%)                               | 2,394,224 (27.2%)                    | <0.1%                            |
| Mother transferred in                 | 3739             | 16,897 (0.6%)                                 | 40,378 (0.4%)                        | 1.9%                             | 11,916 (0.5%)                                 | 36,735 (0.4%)                        | <0.1%                            |
| Nulliparous                           | 52,875           | 770,847 (25.6%)                               | 3,442,982 (36.5%)                    | <b>23.6%</b>                     | 854,639 (32.5%)                               | 2,981,218 (33.9%)                    | 2.9%                             |
| Gestational age at delivery           | 5688             |                                               |                                      | 7.0%                             |                                               |                                      | 1.1%                             |
| ≤ 33 weeks                            |                  | 111,692 (3.7%)                                | 241,749 (2.6%)                       |                                  | 74,103 (2.8%)                                 | 234,337 (2.7%)                       |                                  |
| 34-38 weeks                           |                  | 996,916 (33.0%)                               | 3,067,886 (32.4%)                    |                                  | 856,261 (32.6%)                               | 2,851,452 (32.4%)                    |                                  |
| ≥ 39 weeks                            |                  | 1,911,272 (63.3%)                             | 6,167,839 (65.1%)                    |                                  | 1,696,246 (64.6%)                             | 5,710,852 (64.9%)                    |                                  |
| Multiple gestation                    | 0                | 42,214 (1.4%)                                 | 251,783 (2.7%)                       | 9.0%                             | 55,502 (2.1%)                                 | 203,779 (2.3%)                       | 1.4%                             |
| Non-cephalic presentation             | 67,874           | 66,883 (2.2%)                                 | 320,835 (3.4%)                       | 7.1%                             | 75,334 (2.9%)                                 | 269,783 (3.1%)                       | 1.2%                             |
| Induction of labor                    | 2138             | 582,867 (19.3%)                               | 3,202,372 (33.8%)                    | <b>33.3%</b>                     | 808,436 (30.8%)                               | 2,716,566 (30.9%)                    | <0.1%                            |
| Augmentation of labor                 | 0                | 510,137 (16.9%)                               | 2,653,965 (28.0%)                    | <b>26.9%</b>                     | 667,940 (25.4%)                               | 2,254,165 (25.6%)                    | <0.1%                            |
| Antibiotics during labor              | 0                | 576,007 (19.0%)                               | 3,124,974 (33.0%)                    | <b>32.1%</b>                     | 741,737 (28.2%)                               | 2,613,646 (29.7%)                    | 3.2%                             |
| Chorioamnionitis                      | 0                | 16,516 (0.5%)                                 | 214,771 (2.3%)                       | <b>14.6%</b>                     | 32,463 (1.2%)                                 | 163,209 (1.9%)                       | 5.0%                             |
| Attendant at birth                    | 4179             |                                               |                                      | <b>26.5%</b>                     |                                               |                                      | 2.8%                             |
| Doctor of Medicine                    |                  | 2,271,294 (75.2%)                             | 7,925,032 (83.6%)                    |                                  | 2,113,844 (80.5%)                             | 7,159,862 (81.4%)                    |                                  |
| Doctor of Osteopathy                  |                  | 221,820 (7.3%)                                | 732,536 (7.7%)                       |                                  | 204,976 (7.8%)                                | 681,368 (7.7%)                       |                                  |
| Midwife                               |                  | 500,559 (16.6%)                               | 776,342 (8.2%)                       |                                  | 291,925 (11.1%)                               | 906,094 (10.3%)                      |                                  |
| Other                                 |                  | 28,378 (0.9%)                                 | 42,902 (0.5%)                        |                                  | 15,866 (0.6%)                                 | 49,317 (0.6%)                        |                                  |
| Intrapartum cesarean delivery         | 0                | 233,701 (7.7%)                                | 2,298,310 (24.2%)                    | <b>46.3% (b)</b>                 | 319,229 (12.2%)                               | 1,930,286 (21.9%)                    | <b>28.4% (b)</b>                 |
| Birth weight (grams)                  | 8648             |                                               |                                      | 4.2%                             |                                               |                                      | <0.1%                            |
| ≤ 2499 grams                          |                  | 234,206 (7.8%)                                | 658,217 (6.9%)                       |                                  | 187,725 (7.1%)                                | 609,855 (6.9%)                       |                                  |
| 2500-4000 grams                       |                  | 2,578,578 (85.4%)                             | 8,091,180 (85.4%)                    |                                  | 2,245,204 (85.5%)                             | 7,526,654 (85.6%)                    |                                  |
| > 4000 grams                          |                  | 206,682 (6.8%)                                | 725,531 (7.7%)                       |                                  | 193,682 (7.4%)                                | 660,133 (7.5%)                       |                                  |
| Year of delivery                      | 0                |                                               |                                      | 5.5%                             |                                               |                                      | 5.5%                             |
| 2015                                  |                  | 802,715 (26.5%)                               | 2,347,947 (24.8%)                    |                                  | 687,197 (26.2%)                               | 2,141,112 (24.3%)                    |                                  |
| 2016                                  |                  | 783,620 (25.9%)                               | 2,394,708 (25.3%)                    |                                  | 680,175 (25.9%)                               | 2,223,776 (25.3%)                    |                                  |
| 2017                                  |                  | 739,860 (24.5%)                               | 2,371,217 (25.0%)                    |                                  | 647,408 (24.6%)                               | 2,217,024 (25.2%)                    |                                  |
| 2018                                  |                  | 697,556 (23.1%)                               | 2,365,419 (25.0%)                    |                                  | 611,830 (23.3%)                               | 2,214,730 (25.2%)                    |                                  |

Supplemental Table 4 (continued)

|                                                                                  | Before weighting |                                               |                                      |                                  | After weighting                               |                                      |                                  |
|----------------------------------------------------------------------------------|------------------|-----------------------------------------------|--------------------------------------|----------------------------------|-----------------------------------------------|--------------------------------------|----------------------------------|
|                                                                                  | Missing          | No labor neuraxial analgesia<br>n = 3,023,751 | Neuraxial analgesia<br>n = 9,479,291 | Absolute standardized difference | No labor neuraxial analgesia<br>n = 2,626,611 | Neuraxial analgesia<br>n = 8,796,641 | Absolute standardized difference |
| <i>Hospital county characteristics</i>                                           |                  |                                               |                                      |                                  |                                               |                                      |                                  |
| Core base statistical area classification (a)                                    | 897              |                                               |                                      | <b>13.0%</b>                     |                                               |                                      | 2.2%                             |
| Metropolitan                                                                     |                  | 2,656,304 (87.9%)                             | 8,680,751 (91.6%)                    |                                  | 2,357,205 (89.7%)                             | 7,951,567 (90.4%)                    |                                  |
| Micropolitan                                                                     |                  | 281,223 (9.3%)                                | 657,840 (6.9%)                       |                                  | 217,447 (8.3%)                                | 685,153 (7.8%)                       |                                  |
| Non-metropolitan and non-micropolitan                                            |                  | 85,636 (2.8%)                                 | 140,391 (1.5%)                       |                                  | 51,959 (2.0%)                                 | 159,921 (1.8%)                       |                                  |
| Number of in-hospital births (a)                                                 | 897              | 17,069 (1 sd, 26,520)                         | 16,832 (1 sd, 23,429)                | 1.0%                             | 16,341 (1 sd, 24,736)                         | 16,801 (1 sd, 23,742)                | 1.9%                             |
| Number of physician Anesthesiologists (per 1000 hospital births) (a)             | 68,099           | 12.7 (1 sd, 14.9)                             | 13.5 (1 sd, 15.0)                    | 5.5%                             | 12.8 (1 sd, 15.6)                             | 13.0 (1 sd, 13.3)                    | 1.6%                             |
| Number of certified registered nurse anesthetists (per 1000 hospital births) (a) | 68,099           | 13.6 (1 sd, 29.0)                             | 14.8 (1 sd, 33.0)                    | 3.7%                             | 13.8 (1 sd, 27.4)                             | 13.9 (1 sd, 28.0)                    | <0.1%                            |
| Number of obstetricians and gynecologists (per 1000 hospital births) (a)         | 68,099           | 11.5 (1 sd, 24.4)                             | 12.3 (1 sd, 28.5)                    | 3.0%                             | 11.4 (1 sd, 23.3)                             | 11.6 (1 sd, 23.5)                    | <0.1%                            |
| <i>State characteristics</i>                                                     |                  |                                               |                                      |                                  |                                               |                                      |                                  |
| Hospital state                                                                   | 0                | (c)                                           | (c)                                  | <b>34.0%</b>                     | (c)                                           | (c)                                  | 5.8%                             |

*Abbreviations:* sd: standard deviation.

Results are presented as count (%) or mean (1 standard deviation). An absolute standardized difference greater than 10% indicates a clinically relevant imbalance between groups.

(a) Abstracted from the county-level Area Health Resource File for the year 2015 for births in 2015 and 2016, and for the year 2017 for births in 2017 and 2018.

(b) Delivery mode is not included in the propensity score.

(c) Results for the 51 state identifiers are not presented in this Table for clarity purpose.



**Supplemental Table 5:** Subgroups analyses for the adjusted odds ratios of blood transfusion associated with labor neuraxial analgesia. Adjusted odds ratios were estimated using the inverse propensity-score weighting method, with weights stabilized and truncated at 1% and 99%.

| <b>Low cesarean delivery risk (a)</b>              |               |                                |              |                           |                                |                         |                          |
|----------------------------------------------------|---------------|--------------------------------|--------------|---------------------------|--------------------------------|-------------------------|--------------------------|
| No labor neuraxial analgesia                       |               |                                |              | Labor neuraxial analgesia |                                |                         |                          |
| No. of women                                       | No. of events | Incidence (Per 10,000; 95% CI) | No. of women | No. of events             | Incidence (Per 10,000; 95% CI) | Difference (Per 10,000) | Adjusted OR (95% CI) (b) |
| <i>Vaginal and intrapartum cesarean deliveries</i> |               |                                |              |                           |                                |                         |                          |
| 692,559                                            | 2340          | 33.8 (32.0, 35.7)              | 2,467,490    | 7888                      | 32.0 (31.3, 32.6)              | -1.8                    | <b>0.95 (0.90, 0.99)</b> |
| <i>Vaginal deliveries</i>                          |               |                                |              |                           |                                |                         |                          |
| 600,084                                            | 1678          | 28.0 (26.2, 29.8)              | 1,914,980    | 4843                      | 25.3 (24.6, 26.0)              | -2.7                    | <b>0.90 (0.85, 0.95)</b> |
| <i>Intrapartum cesarean deliveries</i>             |               |                                |              |                           |                                |                         |                          |
| 92,475                                             | 662           | 71.6 (64.1, 79.6)              | 552,510      | 3045                      | 55.1 (53.3, 57.0)              | -16.5                   | <b>0.77 (0.71, 0.83)</b> |

| <b>Low infectious risk (c)</b>                     |               |                                |              |                           |                                |                         |                          |
|----------------------------------------------------|---------------|--------------------------------|--------------|---------------------------|--------------------------------|-------------------------|--------------------------|
| No labor neuraxial analgesia                       |               |                                |              | Labor neuraxial analgesia |                                |                         |                          |
| No. of women                                       | No. of events | Incidence (Per 10,000; 95% CI) | No. of women | No. of events             | Incidence (Per 10,000; 95% CI) | Difference (Per 10,000) | Adjusted OR (95% CI) (b) |
| <i>Vaginal and intrapartum cesarean deliveries</i> |               |                                |              |                           |                                |                         |                          |
| 1,872,381                                          | 4749          | 25.4 (24.5, 26.2)              | 6,124,921    | 14,548                    | 23.8 (23.4, 24.2)              | -1.6                    | <b>0.94 (0.91, 0.97)</b> |
| <i>Vaginal deliveries</i>                          |               |                                |              |                           |                                |                         |                          |
| 1,750,868                                          | 3778          | 21.6 (20.8, 22.4)              | 5,461,659    | 10,556                    | 19.3 (18.9, 19.7)              | -2.3                    | <b>0.89 (0.86, 0.93)</b> |
| <i>Intrapartum cesarean deliveries</i>             |               |                                |              |                           |                                |                         |                          |
| 121,513                                            | 971           | 79.9 (73.9, 86.2)              | 663,262      | 3992                      | 60.2 (58.3, 62.1)              | -19.7                   | <b>0.75 (0.70, 0.81)</b> |

| <b>No diabetes or hypertensive disorders (d)</b>   |               |                                |              |                           |                                |                         |                          |
|----------------------------------------------------|---------------|--------------------------------|--------------|---------------------------|--------------------------------|-------------------------|--------------------------|
| No labor neuraxial analgesia                       |               |                                |              | Labor neuraxial analgesia |                                |                         |                          |
| No. of women                                       | No. of events | Incidence (Per 10,000; 95% CI) | No. of women | No. of events             | Incidence (Per 10,000; 95% CI) | Difference (Per 10,000) | Adjusted OR (95% CI) (b) |
| <i>Vaginal and intrapartum cesarean deliveries</i> |               |                                |              |                           |                                |                         |                          |
| 2,270,575                                          | 7071          | 31.1 (30.3, 32.0)              | 7,583,709    | 21,870                    | 28.8 (28.5, 29.2)              | -2.3                    | <b>0.93 (0.90, 0.95)</b> |
| <i>Vaginal deliveries</i>                          |               |                                |              |                           |                                |                         |                          |
| 2,030,099                                          | 4660          | 23.0 (22.2, 23.7)              | 6,057,868    | 11,884                    | 19.6 (19.3, 20.0)              | -3.4                    | <b>0.85 (0.83, 0.88)</b> |
| <i>Intrapartum cesarean deliveries</i>             |               |                                |              |                           |                                |                         |                          |
| 240,476                                            | 2411          | 100.3 (95.2, 105.6)            | 1,525,841    | 9986                      | 65.4 (64.2, 66.7)              | -34.9                   | <b>0.65 (0.62, 0.68)</b> |

Abbreviations: CI: confidence interval; No.: number; OR: odds ratio.

(a) Defined as singleton, head-first, term (37, 38, 49, 40, or 41 completed weeks) first births

(b) Estimated using weighted logistic regression models. No imbalance was observed after weighting.

(c) Defined as no antibiotics received by the mother during labor, no clinical chorioamnionitis diagnosed during labor, and no maternal temperature >38°C during labor.

(d) Defined as no pre-existing or gestational diabetes, no pre-existing or gestational hypertension, no pre-eclampsia, and no eclampsia
